# Supplementary material
Source: PubMed Central journal article supplement (PMC2729786)

## Supplementary material and methods

**Table S1** Sequences and CGI features on each chromosome in the dog genome

| Chr. | Chromosome |             |                |                                        | CGIs   |             |                |                                        |                 |
|------|------------|-------------|----------------|----------------------------------------|--------|-------------|----------------|----------------------------------------|-----------------|
|      | # Genes    | Length (Mb) | GC content (%) | Obs <sub>CpG</sub> /Exp <sub>CpG</sub> | # CGIs | Length (bp) | GC content (%) | Obs <sub>CpG</sub> /Exp <sub>CpG</sub> | CGI density /Mb |
| 1    | 1105       | 121.6       | 41.5           | 0.268                                  | 3636   | 1065        | 61.9           | 0.744                                  | 29.9            |
| 2    | 750        | 84.3        | 42.8           | 0.288                                  | 3309   | 1063        | 61.7           | 0.743                                  | 39.2            |
| 3    | 454        | 91.2        | 40.3           | 0.240                                  | 1719   | 1073        | 62.0           | 0.769                                  | 18.8            |
| 4    | 544        | 88.1        | 40.3           | 0.236                                  | 1690   | 1060        | 61.9           | 0.763                                  | 19.2            |
| 5    | 935        | 88.5        | 44.2           | 0.269                                  | 2388   | 1067        | 63.0           | 0.753                                  | 27.0            |
| 6    | 834        | 76.9        | 42.6           | 0.270                                  | 2067   | 1109        | 62.6           | 0.765                                  | 26.9            |
| 7    | 615        | 80.3        | 40.9           | 0.238                                  | 1530   | 1082        | 62.6           | 0.771                                  | 19.1            |
| 8    | 616        | 73.9        | 40.5           | 0.241                                  | 1612   | 1097        | 62.6           | 0.761                                  | 21.8            |
| 9    | 1040       | 60.6        | 45.9           | 0.284                                  | 2367   | 1092        | 63.4           | 0.749                                  | 39.1            |
| 10   | 595        | 68.9        | 42.7           | 0.291                                  | 2445   | 1080        | 62.3           | 0.748                                  | 35.5            |
| 11   | 496        | 73.8        | 40.2           | 0.233                                  | 1522   | 1152        | 62.0           | 0.759                                  | 20.6            |
| 12   | 547        | 72.2        | 38.9           | 0.225                                  | 1218   | 1195        | 62.2           | 0.770                                  | 16.9            |
| 13   | 376        | 62.6        | 39.9           | 0.255                                  | 1527   | 1028        | 62.4           | 0.745                                  | 24.4            |
| 14   | 370        | 60.6        | 38.7           | 0.229                                  | 998    | 1162        | 61.5           | 0.773                                  | 16.5            |
| 15   | 461        | 63.7        | 40.1           | 0.272                                  | 1687   | 1068        | 62.3           | 0.756                                  | 26.5            |
| 16   | 428        | 58.8        | 40.9           | 0.272                                  | 1594   | 1104        | 61.8           | 0.744                                  | 27.1            |
| 17   | 560        | 64.0        | 41.7           | 0.248                                  | 1714   | 1205        | 61.8           | 0.750                                  | 26.8            |
| 18   | 687        | 55.2        | 42.7           | 0.291                                  | 1918   | 1077        | 62.3           | 0.743                                  | 34.7            |
| 19   | 180        | 53.5        | 38.3           | 0.230                                  | 840    | 1114        | 61.3           | 0.756                                  | 15.7            |
| 20   | 888        | 57.7        | 44.3           | 0.269                                  | 2128   | 1152        | 63.9           | 0.748                                  | 36.9            |
| 21   | 486        | 50.7        | 40.1           | 0.227                                  | 829    | 1066        | 62.1           | 0.770                                  | 16.3            |
| 22   | 207        | 61.2        | 37.9           | 0.226                                  | 863    | 1049        | 61.7           | 0.763                                  | 14.1            |
| 23   | 308        | 52.1        | 39.8           | 0.216                                  | 826    | 1158        | 62.2           | 0.781                                  | 15.9            |
| 24   | 473        | 47.4        | 44.4           | 0.276                                  | 1938   | 1117        | 62.9           | 0.735                                  | 40.9            |
| 25   | 377        | 51.1        | 41.3           | 0.264                                  | 1626   | 1153        | 62.7           | 0.742                                  | 31.8            |
| 26   | 491        | 38.7        | 45.4           | 0.282                                  | 1292   | 1170        | 62.1           | 0.750                                  | 33.4            |
| 27   | 482        | 45.6        | 40.0           | 0.234                                  | 918    | 1087        | 62.6           | 0.764                                  | 20.1            |
| 28   | 350        | 40.9        | 43.5           | 0.282                                  | 1727   | 1152        | 62.0           | 0.740                                  | 42.2            |
| 29   | 204        | 41.6        | 38.1           | 0.233                                  | 768    | 1132        | 61.0           | 0.767                                  | 18.4            |
| 30   | 367        | 40.0        | 41.4           | 0.250                                  | 915    | 1118        | 62.8           | 0.775                                  | 22.9            |
| 31   | 207        | 38.8        | 39.3           | 0.273                                  | 1262   | 1174        | 62.3           | 0.731                                  | 32.5            |
| 32   | 217        | 38.7        | 36.9           | 0.196                                  | 342    | 1235        | 62.1           | 0.815                                  | 8.8             |
| 33   | 200        | 31.2        | 39.1           | 0.258                                  | 723    | 1087        | 61.8           | 0.767                                  | 23.2            |
| 34   | 222        | 41.9        | 40.3           | 0.259                                  | 919    | 1047        | 60.9           | 0.756                                  | 21.9            |
| 35   | 213        | 26.4        | 41.3           | 0.267                                  | 789    | 1065        | 60.5           | 0.767                                  | 29.9            |
| 36   | 172        | 30.7        | 38.5           | 0.269                                  | 649    | 1136        | 60.7           | 0.785                                  | 21.2            |
| 37   | 213        | 30.7        | 40.1           | 0.275                                  | 809    | 1095        | 61.6           | 0.756                                  | 26.3            |
| 38   | 210        | 23.7        | 40.8           | 0.278                                  | 701    | 1067        | 62.1           | 0.735                                  | 29.6            |
| X    | 835        | 122.2       | 40.2           | 0.239                                  | 2522   | 1066        | 61.7           | 0.736                                  | 20.6            |

**Table S2** Comparison of CpG islands in housekeeping, widely expressed, moderately expressed and narrowly expressed genes

|       | Housekeeping |                       | Widely expressed |                       | Moderately expressed |                       | Narrowly expressed |                       |
|-------|--------------|-----------------------|------------------|-----------------------|----------------------|-----------------------|--------------------|-----------------------|
|       | Total        | CGI+ <sup>a</sup> (%) | Total            | CGI+ <sup>a</sup> (%) | Total                | CGI+ <sup>a</sup> (%) | Total              | CGI+ <sup>a</sup> (%) |
| Dog   | 1257         | 863 (68.7)            | 3416             | 2193 (64.2)           | 2599                 | 1506 (57.9)           | 1357               | 698 (51.4)            |
| Human | 1257         | 1082 (86.1)           | 3416             | 2769 (81.1)           | 2599                 | 1856 (71.4)           | 1357               | 823 (60.6)            |
| Mouse | 1257         | 1033 (82.2)           | 3416             | 2625 (76.8)           | 2599                 | 1705 (65.6)           | 1357               | 736 (54.2)            |

For comparison purpose, only those genes that are homologous in the dog, human and mouse genomes were used.

<sup>a</sup> Number of genes having promoter-associated CGIs.

**Table S3** GO terms that are significantly overrepresented in the D- (without promoter-associated CGIs) genes compared to D+ (with promoter-associated CGIs) genes

| GO code    | GO term description <sup>a</sup>       | D+ (%)      | D- (%)      | <i>P</i> -value <sup>b</sup> |
|------------|----------------------------------------|-------------|-------------|------------------------------|
| GO:0004872 | M: receptor activity                   | 621 (10.3)  | 927 (22.4)  | 2.2×10 <sup>-62</sup>        |
| GO:0007165 | B: signal transduction                 | 1372 (22.7) | 1474 (35.5) | 1.1×10 <sup>-45</sup>        |
| GO:0005886 | C: plasma membrane                     | 665 (11.0)  | 715 (17.2)  | 1.9×10 <sup>-19</sup>        |
| GO:0005102 | M: receptor binding                    | 229 (3.8)   | 308 (7.4)   | 9.3×10 <sup>-16</sup>        |
| GO:0005509 | M: calcium ion binding                 | 401 (6.6)   | 461 (11.1)  | 1.8×10 <sup>-15</sup>        |
| GO:0006811 | B: ion transport                       | 495 (8.2)   | 479 (11.5)  | 1.7×10 <sup>-8</sup>         |
| GO:0008233 | M: peptidase activity                  | 346 (5.7)   | 334 (8.1)   | 4.3×10 <sup>-6</sup>         |
| GO:0005578 | C: proteinaceous extracellular matrix  | 119 (2.0)   | 128 (3.1)   | 4.0×10 <sup>-4</sup>         |
| GO:0003779 | M: actin binding                       | 117 (1.9)   | 125 (3.0)   | 5.6×10 <sup>-4</sup>         |
| GO:0006629 | B: lipid metabolic process             | 303 (5.0)   | 274 (6.6)   | 7.2×10 <sup>-4</sup>         |
| GO:0005216 | M: ion channel activity                | 262 (4.3)   | 239 (5.8)   | 1.2×10 <sup>-3</sup>         |
| GO:0004672 | M: protein kinase activity             | 410 (6.8)   | 341 (8.2)   | 7.0×10 <sup>-3</sup>         |
| GO:0004721 | M: phosphoprotein phosphatase activity | 104 (1.7)   | 103 (2.5)   | 9.0×10 <sup>-3</sup>         |

<sup>a</sup> Gene ontology organizing principles: Cellular component (C), biological process (B) and molecular function (M). Only those GO terms at the 4<sup>th</sup> level or lower were examined.

<sup>b</sup> *P* values were calculated by  $\chi^2$  test for 2×2 contingency table and only the *P*-values < 0.01 were used.

**Table S4** Genes having unknown nucleotides (Ns) in the 2-kb promoter regions

|                                              | Dog (%)     | Human (%) | Mouse (%) |
|----------------------------------------------|-------------|-----------|-----------|
| Genes with $\geq 1$ “N” in the 2-kb sequence | 2469        | 36        | 25        |
| Genes having promoter-associate CGI(s)       | 2084 (84.4) | 6 (16.7)  | 6 (24.0)  |
| Genes with $> 20$ “Ns” in the 2-kb sequence  | 2084        | 31        | 24        |
| Genes having promoter-associate CGI(s)       | 1764 (84.6) | 2 (6.5)   | 5 (20.8)  |

**Table S5** Comparison of CpG islands (CGIs) in the dog-human-mouse homologous genes after excluding genes having >20 “Ns” in the sequences

|       | Homologous genes |                       | Essential genes |                       | Non-essential genes |                       |
|-------|------------------|-----------------------|-----------------|-----------------------|---------------------|-----------------------|
|       | Total            | CGI+ <sup>a</sup> (%) | Total           | CGI+ <sup>a</sup> (%) | Total               | CGI+ <sup>a</sup> (%) |
| Dog   | 8870             | 4933 (55.6)           | 1086            | 645 (59.4)            | 894                 | 381 (42.6)            |
| Human | 8870             | 6311 (71.1)           | 1086            | 846 (80.0)            | 894                 | 491 (54.9)            |
| Mouse | 8870             | 5836 (65.8)           | 1086            | 772 (71.1)            | 894                 | 443 (49.6)            |

<sup>a</sup> Number of genes having promoter-associated CGIs.

**Table S6** CpG cluster density (/Mb) in genomic regions of three species

|       | Genome | Promoter | 3' regions | Genic | Intronic | Intergenic |
|-------|--------|----------|------------|-------|----------|------------|
| Dog   | 128.3  | 674.2    | 321.1      | 126.5 | 109.0    | 94.1       |
| Human | 69.4   | 501.5    | 162.1      | 71.8  | 56.0     | 39.6       |
| Mouse | 44.4   | 286.7    | 84.4       | 48.0  | 29.6     | 26.9       |

CpG clusters were identified by the CpGcluster algorithm.

**Fig. S1.** Correlation between number of CGIs and genomic factors on each chromosome in the dog genome. (A) Number of CGIs versus chromosome length. (B) Number of CGIs versus number of gene in a chromosome.

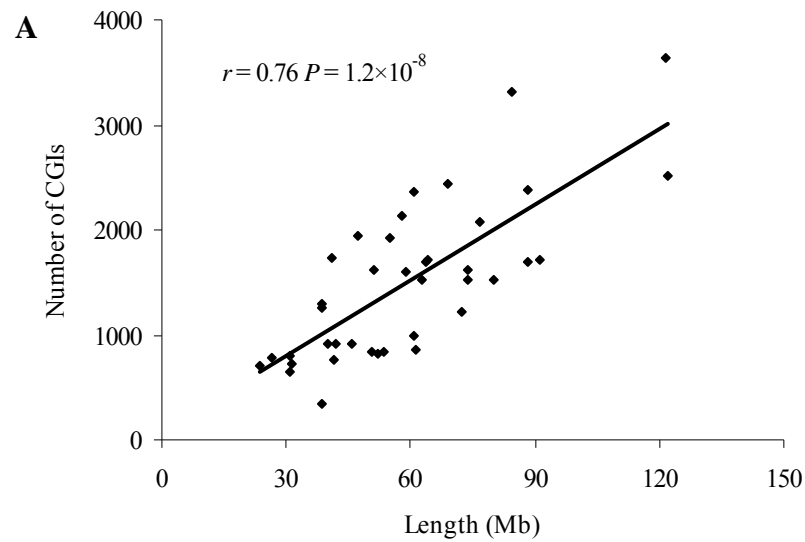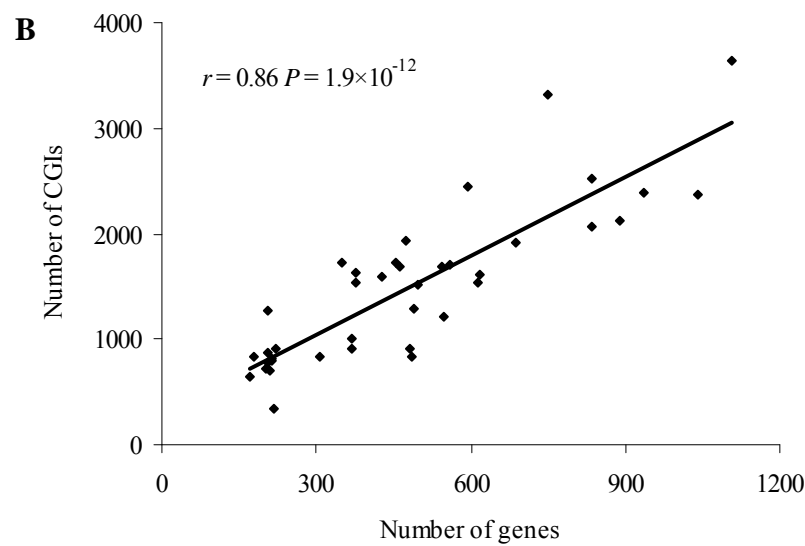

**Fig. S2.** Distribution of CGI density (/Mb) in the dog, human and mouse genomes.

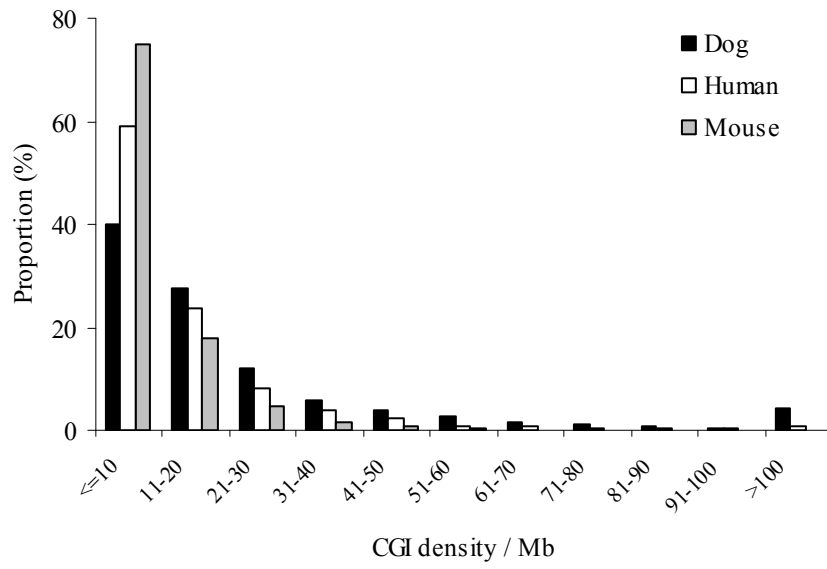



**Fig. S3.** Number of CGIs in the dog, human and mouse genomes and their genomic regions.

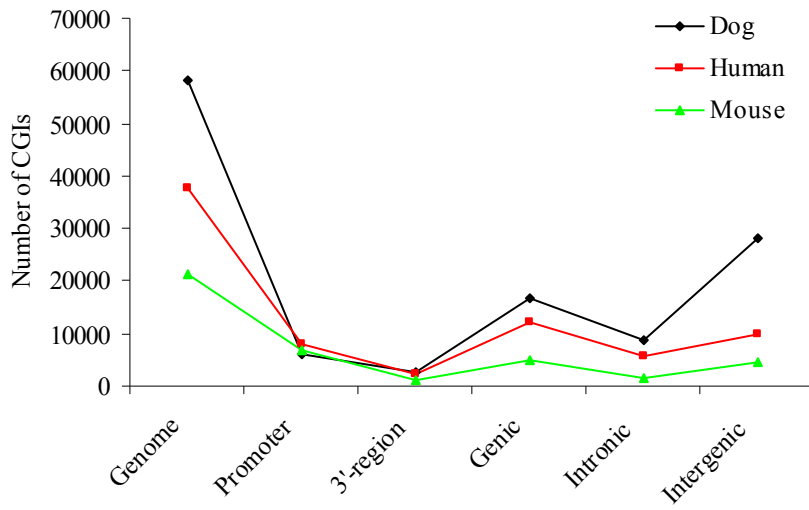

**Fig. S4.** Distribution of CGIs in the dog and human homologous genes. A total of 10,196 homologous genes were compared. D+, H+, D-, and H- denote the presence (+) or absence (-) of promoter-associated CGIs in the dog (D) or the human (H) genome.

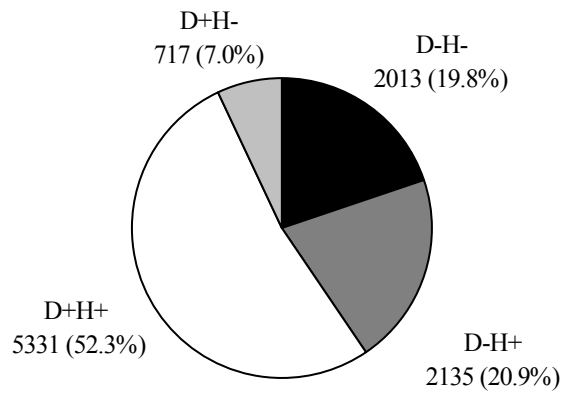

Supplement: NIHMS134459-supplement-01.pdf [file NIHMS134459-supplement-01.pdf]
